# Supplementary material for: Novel Fluorescence Probe toward Cu2+ Based on Fluorescein Derivatives and Its Bioimaging in Cells
Source: Biosensors (Basel). 2022 Sep 6;12(9):732. doi: 10.3390/bios12090732 (PMC9496130; doi:10.3390/bios12090732)
Supplement: Supplementary file 1 [file biosensors-12-00732-s001.zip › biosensors-1853251-supplementary.pdf]

# **Novel Fluorescence Probe toward Cu<sup>2+</sup> Based on Fluorescein Derivatives and Its Bioimaging in Cell**

## **CONTENTS**

|                                 |            |
|---------------------------------|------------|
| <b>1. Synthesis of Probe A5</b> | <b>S-2</b> |
| <b>2. MTT Assay</b>             | <b>S-5</b> |
| <b>3. Visual Detection</b>      | <b>S-5</b> |

## 1. Synthesis of Probe A5

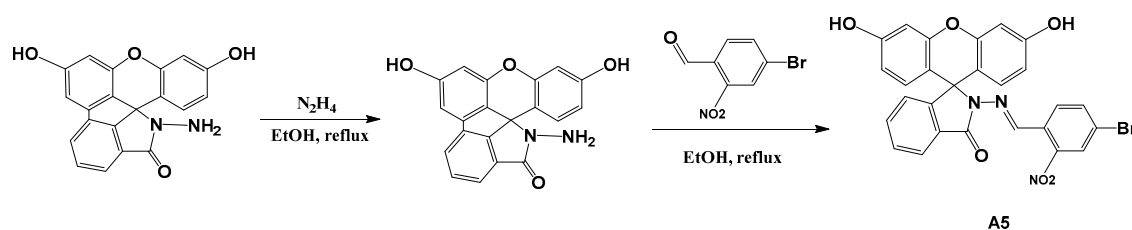

**Scheme S1** Synthesis route of probe **A5**

Fluorescein hydrazine was synthesized from fluorescein and hydrazine according to the literature. Fluorescein hydrazine (3.39 g, 9.78 mmol) and 4-Bromo-2-nitrobenzaldehyde, (1.50 g, 6.52 mmol) were dissolved in 50 mL of ethanol, refluxed for 3 h, cooled to room temperature after the reaction. The precipitate was filtered out, washed several times with absolute ethanol, and the pale-yellow solid was obtained and placed in a dark place at 5 °C for use.

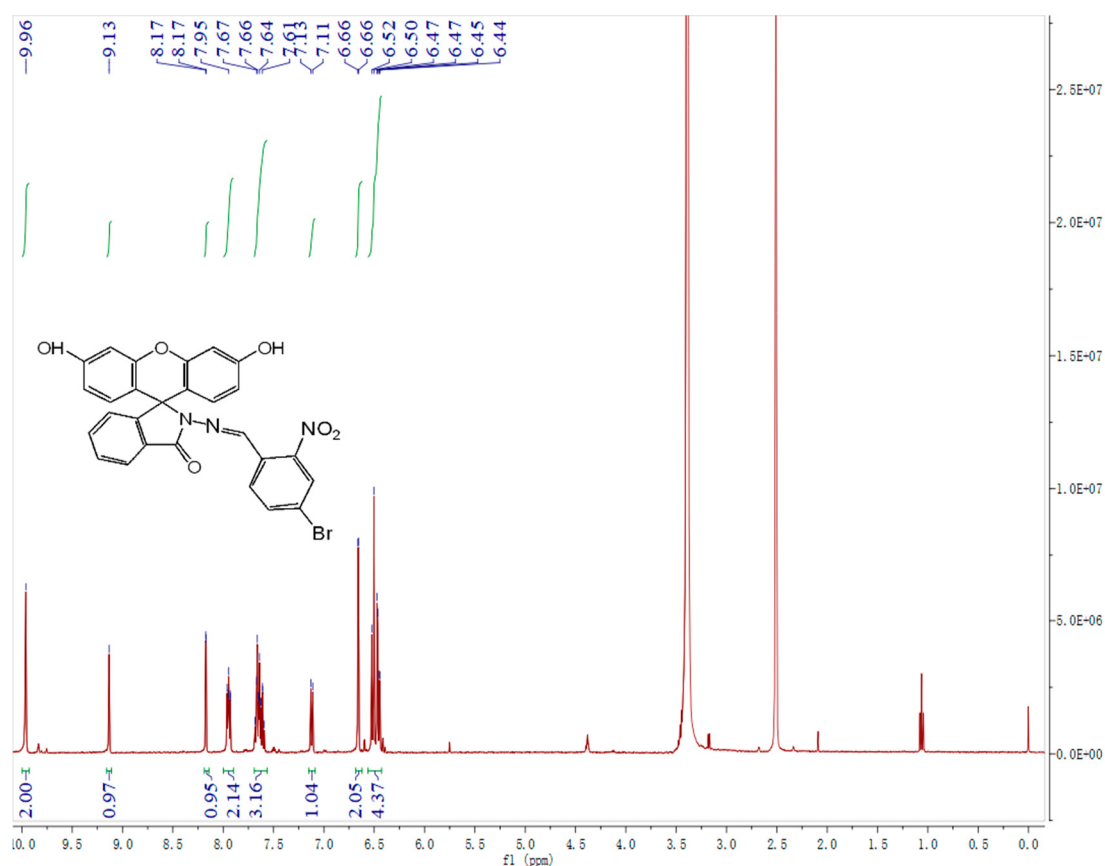

**Figure S1**  $^1\text{H}$  NMR spectrum of compound **A5** in  $\text{d}_6\text{-DMSO}$ .

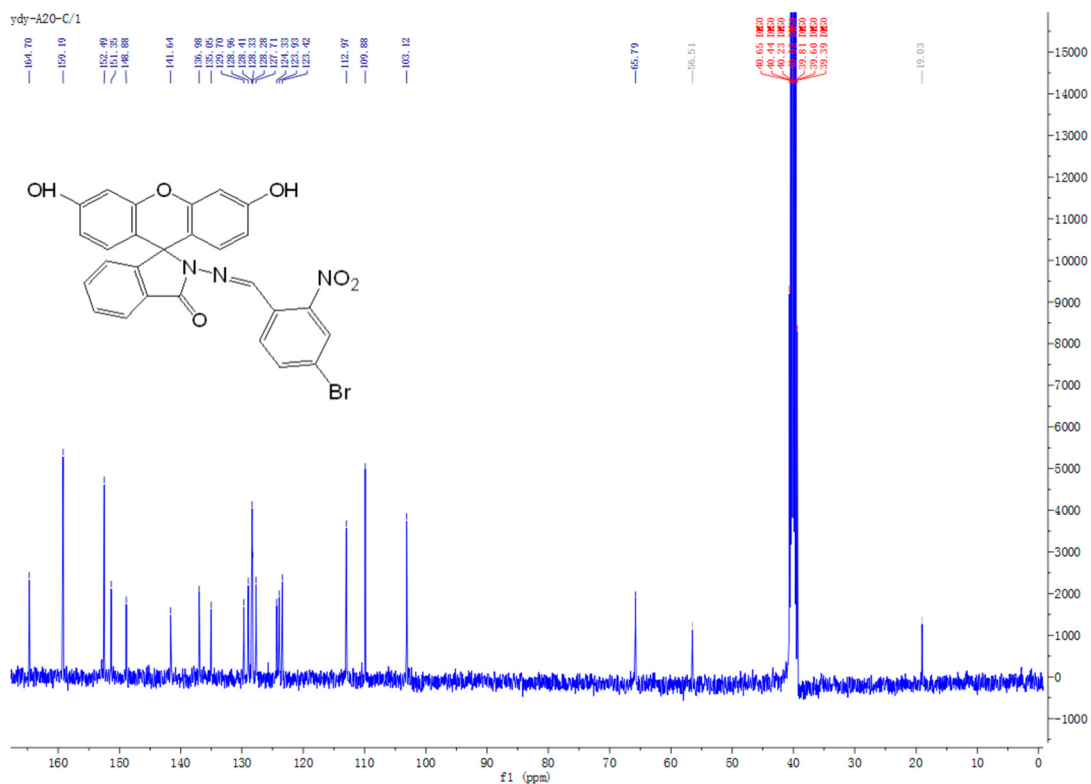

Figure S2  $^{13}\text{C}$  NMR spectrum of compound A5 in  $\text{d}_6\text{-DMSO}$ .

## Mass Spectrum SmartFormula Report

### Analysis Info

Analysis Name C:\Users\A\DE\DE\Desktop\A-20\A-20.d  
 Method ESI-MS  
 Sample Name Id016-003  
 Comment  
 Acquisition Date 2018/4/27 15:51:19  
 Operator service  
 Instrument / Ser# micrOTOF-Q II 10280

### Acquisition Parameter

Source Type ESI  
 Focus Not active  
 Scan Begin 50 m/z  
 Scan End 3000 m/z  
 Ion Polarity Positive  
 Set Capillary 4500 V  
 Set End Plate Offset -500 V  
 Set Collision Cell RF 110.0 Vpp  
 Set Nebulizer 0.4 Bar  
 Set Dry Heater 180 °C  
 Set Dry Gas 4.0 l/min  
 Set Divert Valve Source

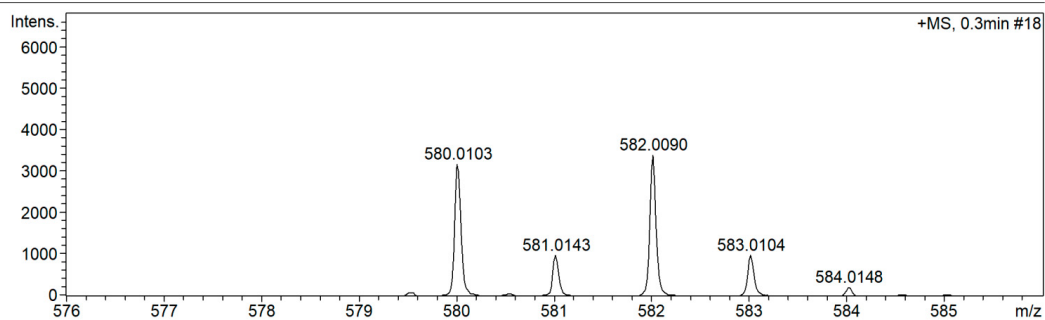

| Meas. m/z | # | Formula                                                           | Score  | m/z      | err [mDa] | err [ppm] | mSig | rdb  | ej   | N-R |
|-----------|---|-------------------------------------------------------------------|--------|----------|-----------|-----------|------|------|------|-----|
| 580.0103  | 1 | C <sub>27</sub> H <sub>16</sub> BrN <sub>3</sub> NaO <sub>6</sub> | 100.00 | 580.0115 | 1.1       | 2.0       | 14.5 | 20.5 | even | ok  |

Figure S3 ESI-MS spectrum of A5

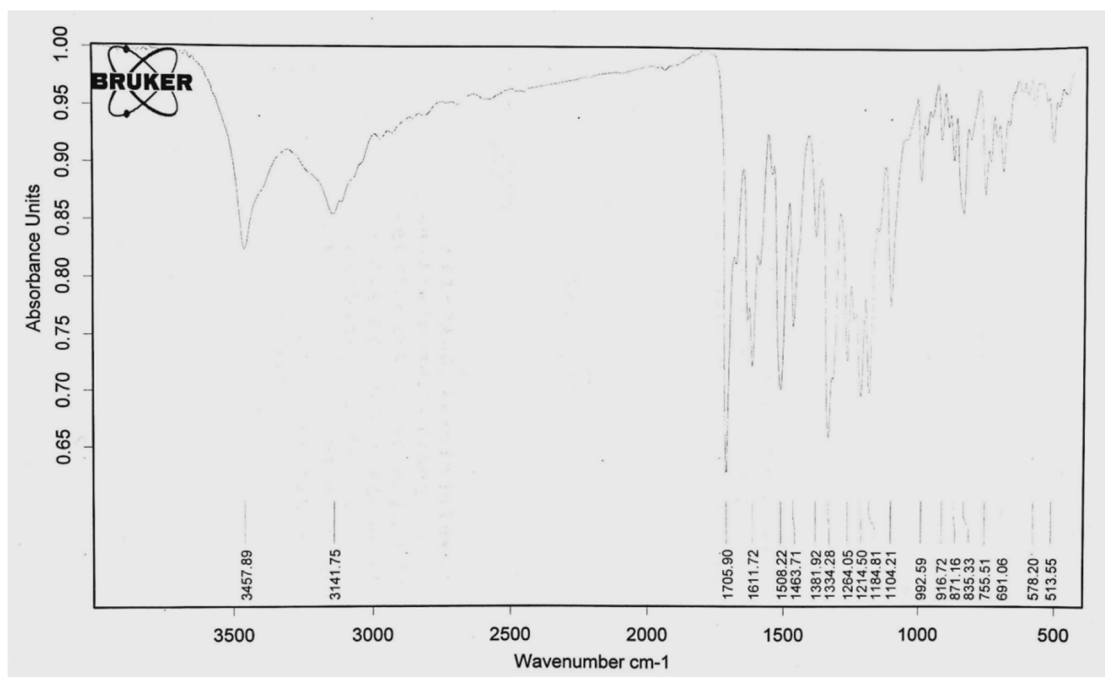

**Figure S4** IR spectrum of A5

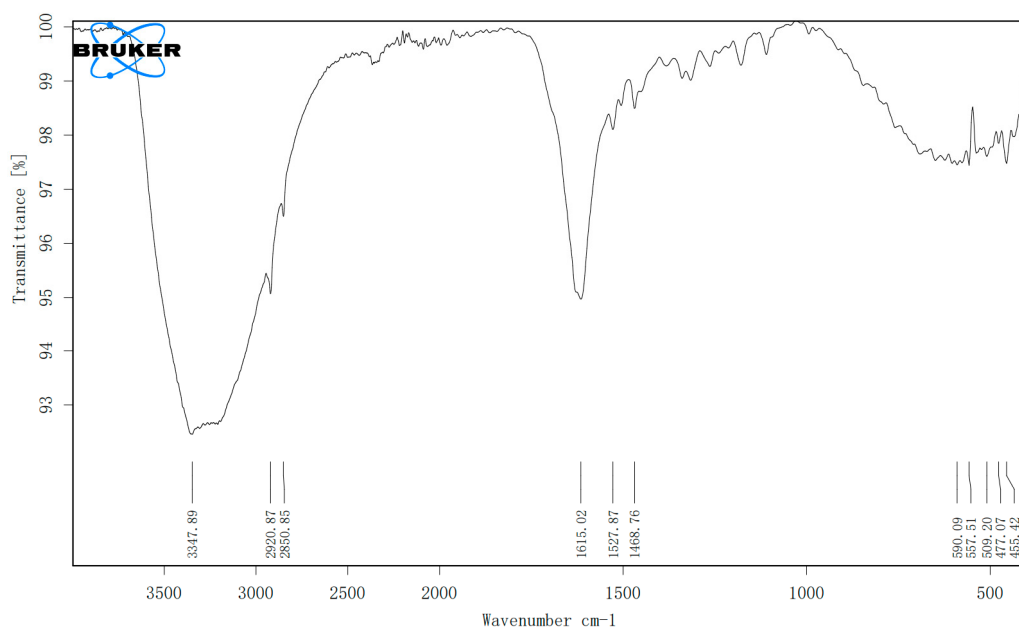

**Figure S5** IR spectrum of A5 and Cu<sup>2+</sup>

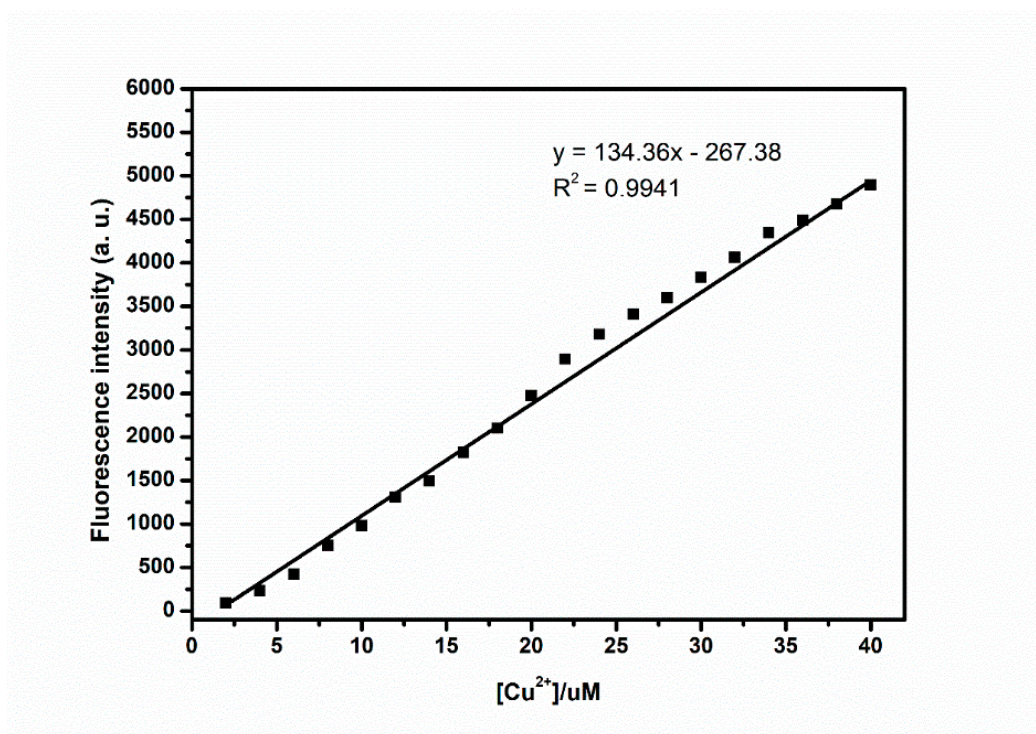

**Figure S6** The linear correlation between the maximum fluorescence intensity (525 nm) and the concentration of  $\text{Cu}^{2+}$ ;  $\lambda_{\text{ex}} = 440 \text{ nm}$ .

### 3. MTT Assay

**3-(4,5-Dimethylthiazol-2-yl)-2,5-diphenyltetrazolium bromide (MTT) assay.** MCF-7 cells were seeded in 96-well plates at a density of 5000 cells/well. Plates were maintained at 37 °C in a 5%  $\text{CO}_2$ / 95% air incubator for 24 hours. Then, the culture medium in each well was replaced by fresh medium containing different concentrations of probe **A5**. After 24 hours treatment, into each well, 15  $\mu\text{L}$  MTT solutions (5 mg/mL in phosphate buffer solution) were added. After 4 hours incubation at 37 °C, the absorbance of each wells at 490 nm was recorded by the Elx800 Absorbance Microplate Reader.

Table S1. The cell viability of different concentration of probe **A5**

| Sample    | 2.5 $\mu\text{M/L}$ | 5 $\mu\text{M/L}$ | 10 $\mu\text{M/L}$ | 20 $\mu\text{M/L}$ | 40 $\mu\text{M/L}$ |
|-----------|---------------------|-------------------|--------------------|--------------------|--------------------|
| <b>A5</b> | 98.7                | 91.0              | 90.7               | 82.0               | 73.3               |

### 4. Visual Detection

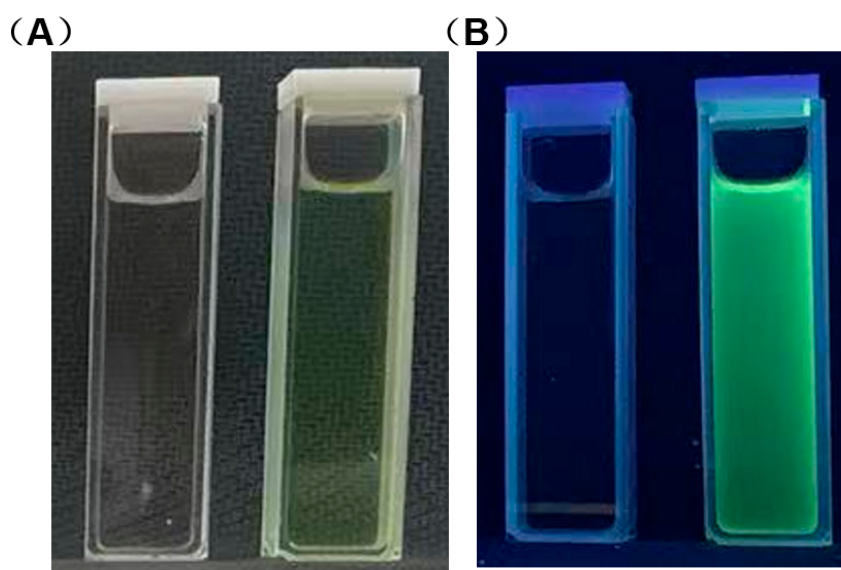

**Figure S7** (A) Pictures under ambient light. (B) Pictures under 365 UV lamp.

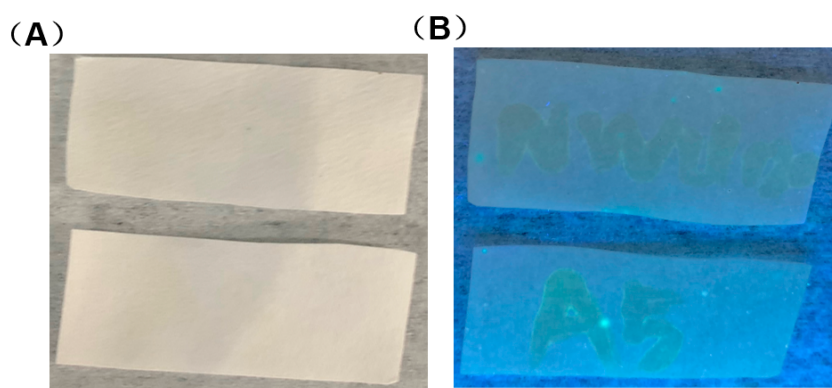

**Figure S8** Photographs of A5 and after  $\text{Cu}^{2+}$  was written on a test paper, (A) Pictures under ambient light. (B) Pictures under 365 UV lamp.
